# Supplementary material for: Effects of Various Processing Methods on the Nutritional Quality and Carcinogenic Substances of Bactrian Camel (Camelus bactrianus) Meat
Source: MDPI journal article supplement (doi:10.3390/foods11203276), 2022-10-20
Supplement: s1 [file s1]

Supplementary Table S1. Comparison of amino acid content (g/100 g) of camel meat after different thermal processing methods and processing times.

| Processing method | Control                 | Steaming                 |                          |                           |                         |                         | Control                 | Boiling                 |                         |                          |                         |                         |
|-------------------|-------------------------|--------------------------|--------------------------|---------------------------|-------------------------|-------------------------|-------------------------|-------------------------|-------------------------|--------------------------|-------------------------|-------------------------|
| Processing time   | Untreated               | S-20min                  | S-25min                  | S-30min                   | S-35min                 | S-40min                 | Untreated               | B-20min                 | B-25min                 | B-30min                  | B-35min                 | B-40min                 |
| amino acids       |                         |                          |                          |                           |                         |                         |                         |                         |                         |                          |                         |                         |
| LYS*              | 1.84±0.12 <sup>d</sup>  | 3.41±0.01 <sup>bc</sup>  | 3.57±0.15 <sup>ab</sup>  | 3.51±0.04 <sup>b</sup>    | 3.76±0.07 <sup>a</sup>  | 3.25±0.04 <sup>c</sup>  | 1.84±0.12 <sup>d</sup>  | 3.46±0.01 <sup>b</sup>  | 3.68±0.01 <sup>a</sup>  | 3.35±0.13 <sup>bc</sup>  | 3.16±0.05 <sup>c</sup>  | 3.74±0.02 <sup>a</sup>  |
| PHE*              | 0.84±0.04 <sup>b</sup>  | 1.45±0.01 <sup>a</sup>   | 1.51±0.08 <sup>a</sup>   | 1.49±0.01 <sup>a</sup>    | 1.49±0.10 <sup>a</sup>  | 1.44±0.04 <sup>a</sup>  | 0.84±0.04 <sup>d</sup>  | 1.57±0.01 <sup>ab</sup> | 1.68±0.03 <sup>a</sup>  | 1.32±0.14 <sup>c</sup>   | 1.42±0.07 <sup>bc</sup> | 1.59±0.01 <sup>a</sup>  |
| MET*              | 0.51±0.05 <sup>d</sup>  | 1.08±0.01 <sup>bc</sup>  | 1.13±0.03 <sup>ab</sup>  | 1.13±0.03 <sup>ab</sup>   | 1.20±0.02 <sup>a</sup>  | 1.04±0.01 <sup>c</sup>  | 0.51±0.05 <sup>d</sup>  | 1.10±0.01 <sup>ab</sup> | 1.16±0.01 <sup>a</sup>  | 1.07±0.04 <sup>b</sup>   | 0.99±0.01 <sup>c</sup>  | 1.13±0.01 <sup>ab</sup> |
| ILE*              | 0.97±0.08 <sup>d</sup>  | 1.82±0.01 <sup>bc</sup>  | 1.92±0.07 <sup>ab</sup>  | 1.91±0.03 <sup>ab</sup>   | 2.02±0.07 <sup>a</sup>  | 1.76±0.01 <sup>c</sup>  | 0.97±0.08 <sup>c</sup>  | 1.82±0.01 <sup>b</sup>  | 1.94±0.01 <sup>a</sup>  | 1.79±0.04 <sup>b</sup>   | 1.72±0.01 <sup>b</sup>  | 1.99±0.01 <sup>a</sup>  |
| LEU*              | 1.74±0.14 <sup>c</sup>  | 3.22±0.04 <sup>b</sup>   | 3.39±0.13 <sup>ab</sup>  | 3.33±0.07 <sup>ab</sup>   | 3.57±0.13 <sup>a</sup>  | 3.14±0.03 <sup>b</sup>  | 1.74±0.14 <sup>c</sup>  | 3.25±0.03 <sup>b</sup>  | 3.48±0.01 <sup>a</sup>  | 3.21±0.07 <sup>b</sup>   | 3.11±0.01 <sup>b</sup>  | 3.53±0.04 <sup>a</sup>  |
| THR*              | 0.94±0.07 <sup>d</sup>  | 1.71±0.01 <sup>bc</sup>  | 1.80±0.07 <sup>ab</sup>  | 1.79±0.05 <sup>abc</sup>  | 1.91±0.05 <sup>a</sup>  | 1.67±0.01 <sup>c</sup>  | 0.94±0.07 <sup>e</sup>  | 1.76±0.02 <sup>bc</sup> | 1.83±0.01 <sup>ab</sup> | 1.69±0.06 <sup>cd</sup>  | 1.61±0.01 <sup>d</sup>  | 1.87±0.02 <sup>a</sup>  |
| VAL*              | 1.02±0.08 <sup>d</sup>  | 1.95±0.01 <sup>bc</sup>  | 2.03±0.08 <sup>ab</sup>  | 2.02±0.04 <sup>ab</sup>   | 2.15±0.07 <sup>a</sup>  | 1.84±0.03 <sup>c</sup>  | 1.02±0.08 <sup>c</sup>  | 1.91±0.01 <sup>b</sup>  | 2.04±0.01 <sup>a</sup>  | 1.90±0.06 <sup>b</sup>   | 1.87±0.01 <sup>b</sup>  | 2.12±0.04 <sup>a</sup>  |
| SER               | 0.84±0.06 <sup>d</sup>  | 1.44±0.2 <sup>bc</sup>   | 1.50±0.07 <sup>ab</sup>  | 1.48±0.03 <sup>ab</sup>   | 1.58±0.04 <sup>a</sup>  | 1.35±0.04 <sup>c</sup>  | 0.84±0.06 <sup>d</sup>  | 1.46±0.01 <sup>bc</sup> | 1.54±0.01 <sup>ab</sup> | 1.40±0.06 <sup>c</sup>   | 1.38±0.04 <sup>c</sup>  | 1.57±0.02 <sup>a</sup>  |
| ASP               | 1.91±0.10 <sup>d</sup>  | 3.74±0.01 <sup>bc</sup>  | 3.92±0.18 <sup>ab</sup>  | 3.88±0.06 <sup>b</sup>    | 4.14±0.11 <sup>a</sup>  | 3.63±0.04 <sup>c</sup>  | 1.91±0.10 <sup>c</sup>  | 3.71±0.01 <sup>b</sup>  | 3.95±0.03 <sup>a</sup>  | 3.67±0.13 <sup>b</sup>   | 3.58±0.01 <sup>b</sup>  | 4.01±0.01 <sup>a</sup>  |
| GLU               | 3.22±0.23 <sup>d</sup>  | 5.86±0.01 <sup>bc</sup>  | 6.20±0.28 <sup>ab</sup>  | 6.14±0.12 <sup>ab</sup>   | 6.55±0.17 <sup>a</sup>  | 5.66±0.04 <sup>c</sup>  | 3.22±0.23 <sup>d</sup>  | 5.91±0.01 <sup>b</sup>  | 6.29±0.04 <sup>a</sup>  | 5.78±0.18 <sup>bc</sup>  | 5.57±0.01 <sup>c</sup>  | 6.45±0.04 <sup>a</sup>  |
| ALA               | 1.18±0.06 <sup>d</sup>  | 2.12±0.01 <sup>bc</sup>  | 2.20±0.08 <sup>ab</sup>  | 2.16±0.04 <sup>bc</sup>   | 2.31±0.01 <sup>a</sup>  | 2.05±0.07 <sup>c</sup>  | 1.18±0.06 <sup>d</sup>  | 2.16±0.03 <sup>bc</sup> | 2.29±0.03 <sup>a</sup>  | 2.05±0.09 <sup>c</sup>   | 2.11±0.01 <sup>c</sup>  | 2.27±0.02 <sup>ab</sup> |
| GLY               | 0.98±0.09 <sup>d</sup>  | 1.61±0.01 <sup>b</sup>   | 1.71±0.07 <sup>ab</sup>  | 1.67±0.01 <sup>b</sup>    | 1.83±0.06 <sup>a</sup>  | 1.46±0.01 <sup>c</sup>  | 0.98±0.09 <sup>d</sup>  | 1.77±0.01 <sup>b</sup>  | 1.84±0.11 <sup>ab</sup> | 1.57±0.06 <sup>c</sup>   | 1.98±0.01 <sup>a</sup>  | 1.84±0.06 <sup>ab</sup> |
| HIS*              | 0.99±0.02 <sup>c</sup>  | 1.36±0.01 <sup>ab</sup>  | 1.39±0.08 <sup>a</sup>   | 1.37±0.04 <sup>a</sup>    | 1.44±0.05 <sup>a</sup>  | 1.27±0.02 <sup>b</sup>  | 0.99±0.02 <sup>c</sup>  | 1.37±0.01 <sup>a</sup>  | 1.42±0.01 <sup>a</sup>  | 1.23±0.05 <sup>b</sup>   | 1.28±0.07 <sup>b</sup>  | 1.41±0.01 <sup>a</sup>  |
| TYR               | 0.73±0.04 <sup>d</sup>  | 1.29±0.01 <sup>bc</sup>  | 1.36±0.05 <sup>ab</sup>  | 1.34±0.01 <sup>ab</sup>   | 1.40±0.04 <sup>a</sup>  | 1.24±0.01 <sup>c</sup>  | 0.73±0.04 <sup>c</sup>  | 1.39±0.01 <sup>a</sup>  | 1.46±0.03 <sup>a</sup>  | 1.26±0.08 <sup>b</sup>   | 1.17±0.02 <sup>b</sup>  | 1.40±0.01 <sup>a</sup>  |
| ARG               | 1.31±0.08 <sup>c</sup>  | 2.38±0.02 <sup>c</sup>   | 2.52±0.08 <sup>b</sup>   | 2.47±0.03 <sup>bc</sup>   | 2.65±0.01 <sup>a</sup>  | 2.25±0.02 <sup>d</sup>  | 1.31±0.08 <sup>c</sup>  | 2.43±0.01 <sup>b</sup>  | 2.56±0.03 <sup>a</sup>  | 2.35±0.08 <sup>b</sup>   | 2.36±0.01 <sup>b</sup>  | 2.63±0.01 <sup>a</sup>  |
| PRO               | 0.75±0.15 <sup>b</sup>  | 1.28±0.01 <sup>a</sup>   | 1.33±0.12 <sup>a</sup>   | 1.24±0.06 <sup>a</sup>    | 1.39±0.01 <sup>a</sup>  | 1.24±0.01 <sup>a</sup>  | 0.75±0.15 <sup>c</sup>  | 1.54±0.01 <sup>a</sup>  | 1.51±0.08 <sup>a</sup>  | 1.21±0.08 <sup>b</sup>   | 1.42±0.01 <sup>ab</sup> | 1.43±0.01 <sup>a</sup>  |
| TAA               | 19.78±1.01 <sup>d</sup> | 35.69±0.01 <sup>bc</sup> | 37.44±1.63 <sup>ab</sup> | 36.90±0.54 <sup>b</sup>   | 39.36±0.89 <sup>a</sup> | 34.28±0.01 <sup>c</sup> | 19.78±1.01 <sup>d</sup> | 36.54±0.02 <sup>b</sup> | 38.66±0.18 <sup>a</sup> | 34.83±1.38 <sup>bc</sup> | 34.67±0.03 <sup>c</sup> | 38.87±0.02 <sup>a</sup> |
| EAA               | 7.85±0.55 <sup>d</sup>  | 14.62±0.01 <sup>bc</sup> | 15.34±0.62 <sup>ab</sup> | 15.17±0.27 <sup>abc</sup> | 16.09±0.52 <sup>a</sup> | 14.14±0.01 <sup>c</sup> | 7.85±0.55 <sup>d</sup>  | 14.86±0.01 <sup>b</sup> | 15.81±0.02 <sup>a</sup> | 14.32±0.55 <sup>bc</sup> | 13.85±0.02 <sup>c</sup> | 15.89±0.02 <sup>a</sup> |
| NEAA              | 11.92±0.51 <sup>d</sup> | 21.07±0.02 <sup>bc</sup> | 22.11±1.01 <sup>ab</sup> | 21.73±0.27 <sup>b</sup>   | 23.28±0.37 <sup>a</sup> | 20.14±0.02 <sup>c</sup> | 11.92±0.51 <sup>d</sup> | 21.68±0.02 <sup>b</sup> | 22.85±0.16 <sup>a</sup> | 20.51±0.83 <sup>bc</sup> | 20.82±0.03 <sup>c</sup> | 22.98±0.01 <sup>a</sup> |
| EAA/TAA           | 39.69±1.13 <sup>a</sup> | 40.96±0.02 <sup>a</sup>  | 40.97±0.13 <sup>a</sup>  | 41.11±0.13 <sup>a</sup>   | 40.87±0.39 <sup>a</sup> | 41.25±0.01 <sup>a</sup> | 39.69±1.13 <sup>a</sup> | 40.67±0.01 <sup>a</sup> | 40.89±0.13 <sup>a</sup> | 41.12±0.04 <sup>a</sup>  | 39.95±0.03 <sup>a</sup> | 40.88±0.02 <sup>a</sup> |
| EAA/NEAA          | 65.84±3.08 <sup>a</sup> | 69.39±0.01 <sup>a</sup>  | 69.39±0.39 <sup>a</sup>  | 69.81±0.37 <sup>a</sup>   | 69.10±1.13 <sup>a</sup> | 70.21±0.01 <sup>a</sup> | 65.84±3.08 <sup>a</sup> | 68.54±0.02 <sup>a</sup> | 69.17±0.38 <sup>a</sup> | 69.84±0.13 <sup>a</sup>  | 66.52±0.02 <sup>a</sup> | 69.15±0.03 <sup>a</sup> |

Supplementary Table S1 continued.

|          | Control                 | Frying                  |                          |                           |                          |                         | Control                 | Microwaving              |                         |                         |                         |                         |
|----------|-------------------------|-------------------------|--------------------------|---------------------------|--------------------------|-------------------------|-------------------------|--------------------------|-------------------------|-------------------------|-------------------------|-------------------------|
|          | Untreated               | F-3min                  | F-4min                   | F-5min                    | F-6min                   | F-7min                  | Untreated               | M-3min                   | M-4min                  | M-5min                  | M-6min                  | M-7min                  |
| LYS*     | 1.84±0.12 <sup>c</sup>  | 2.74±0.04 <sup>b</sup>  | 2.77±0.41 <sup>b</sup>   | 2.97±0.04 <sup>ab</sup>   | 3.11±0.21 <sup>ab</sup>  | 3.37±0.03 <sup>a</sup>  | 1.84±0.12 <sup>d</sup>  | 2.58±0.02 <sup>c</sup>   | 2.88±0.34 <sup>c</sup>  | 2.56±0.05 <sup>c</sup>  | 3.37±0.24 <sup>b</sup>  | 3.88±0.01 <sup>a</sup>  |
| PHE*     | 0.84±0.04 <sup>b</sup>  | 1.14±0.04 <sup>ab</sup> | 1.12±0.29 <sup>ab</sup>  | 1.23±0.01 <sup>a</sup>    | 1.37±0.23 <sup>a</sup>   | 1.41±0.01 <sup>a</sup>  | 0.84±0.04 <sup>d</sup>  | 1.02±0.03 <sup>cd</sup>  | 1.18±0.20 <sup>c</sup>  | 1.06±0.03 <sup>c</sup>  | 1.49±0.08 <sup>b</sup>  | 1.72±0.03 <sup>a</sup>  |
| MET*     | 0.51±0.05 <sup>b</sup>  | 0.84±0.01 <sup>a</sup>  | 0.83±0.17 <sup>a</sup>   | 0.87±0.08 <sup>a</sup>    | 0.98±0.11 <sup>a</sup>   | 1.02±0.03 <sup>a</sup>  | 0.51±0.05 <sup>e</sup>  | 0.83±0.03 <sup>cd</sup>  | 0.92±0.06 <sup>c</sup>  | 0.77±0.03 <sup>d</sup>  | 1.05±0.04 <sup>b</sup>  | 1.28±0.07 <sup>a</sup>  |
| ILE*     | 0.97±0.08 <sup>c</sup>  | 1.46±0.04 <sup>b</sup>  | 1.51±0.24 <sup>b</sup>   | 1.62±0.01 <sup>b</sup>    | 1.68±0.07 <sup>ab</sup>  | 1.88±0.01 <sup>a</sup>  | 0.97±0.08 <sup>d</sup>  | 1.45±0.07 <sup>c</sup>   | 1.49±0.08 <sup>c</sup>  | 1.36±0.02 <sup>c</sup>  | 1.77±0.11 <sup>b</sup>  | 2.05±0.02 <sup>a</sup>  |
| LEU*     | 1.74±0.14 <sup>c</sup>  | 2.55±0.01 <sup>b</sup>  | 2.67±0.40 <sup>b</sup>   | 2.87±0.01 <sup>b</sup>    | 2.98±0.19 <sup>ab</sup>  | 3.34±0.03 <sup>a</sup>  | 1.74±0.14 <sup>d</sup>  | 2.47±0.02 <sup>c</sup>   | 2.71±0.25 <sup>c</sup>  | 2.41±0.01 <sup>c</sup>  | 3.12±0.20 <sup>b</sup>  | 3.64±0.03 <sup>a</sup>  |
| THR*     | 0.94±0.07 <sup>d</sup>  | 1.35±0.02 <sup>c</sup>  | 1.44±0.23 <sup>bc</sup>  | 1.55±0.01 <sup>abc</sup>  | 1.64±0.10 <sup>ab</sup>  | 1.77±0.02 <sup>a</sup>  | 0.94±0.07 <sup>d</sup>  | 1.33±0.01 <sup>c</sup>   | 1.47±0.17 <sup>c</sup>  | 1.29±0.01 <sup>c</sup>  | 1.67±0.08 <sup>b</sup>  | 1.96±0.03 <sup>a</sup>  |
| VAL*     | 1.02±0.08 <sup>c</sup>  | 1.53±0.03 <sup>b</sup>  | 1.57±0.23 <sup>b</sup>   | 1.68±0.01 <sup>b</sup>    | 1.78±0.13 <sup>ab</sup>  | 1.97±0.04 <sup>a</sup>  | 1.02±0.08 <sup>e</sup>  | 1.45±0.01 <sup>cd</sup>  | 1.62±0.14 <sup>c</sup>  | 1.43±0.01 <sup>d</sup>  | 1.84±0.11 <sup>b</sup>  | 2.12±0.01 <sup>a</sup>  |
| SER      | 0.84±0.06 <sup>d</sup>  | 1.16±0.01 <sup>c</sup>  | 1.20±0.18 <sup>bc</sup>  | 1.32±0.01 <sup>bc</sup>   | 1.37±0.07 <sup>ab</sup>  | 1.54±0.04 <sup>a</sup>  | 0.84±0.06 <sup>d</sup>  | 1.12±0.02 <sup>c</sup>   | 1.22±0.12 <sup>c</sup>  | 1.08±0.01 <sup>c</sup>  | 1.39±0.08 <sup>b</sup>  | 1.63±0.03 <sup>a</sup>  |
| ASP      | 1.91±0.10 <sup>d</sup>  | 2.87±0.03 <sup>c</sup>  | 3.01±0.46 <sup>bc</sup>  | 3.23±0.01 <sup>bc</sup>   | 3.42±0.24 <sup>ab</sup>  | 3.72±0.02 <sup>a</sup>  | 1.91±0.10 <sup>e</sup>  | 2.84±0.06 <sup>cd</sup>  | 3.14±0.28 <sup>c</sup>  | 2.74±0.04 <sup>d</sup>  | 3.56±0.19 <sup>b</sup>  | 4.12±0.01 <sup>a</sup>  |
| GLU      | 3.22±0.23 <sup>d</sup>  | 4.61±0.01 <sup>c</sup>  | 4.85±0.78 <sup>bc</sup>  | 5.21±0.03 <sup>abc</sup>  | 5.53±0.37 <sup>ab</sup>  | 6.02±0.02 <sup>a</sup>  | 3.22±0.23 <sup>e</sup>  | 4.56±0.04 <sup>cd</sup>  | 5.09±0.46 <sup>c</sup>  | 4.38±0.11 <sup>d</sup>  | 5.76±0.37 <sup>b</sup>  | 6.66±0.01 <sup>a</sup>  |
| ALA      | 1.18±0.06 <sup>c</sup>  | 1.72±0.02 <sup>b</sup>  | 1.74±0.25 <sup>b</sup>   | 1.90±0.01 <sup>b</sup>    | 1.85±0.06 <sup>b</sup>   | 2.23±0.04 <sup>a</sup>  | 1.18±0.06 <sup>e</sup>  | 1.63±0.03 <sup>cd</sup>  | 1.80±0.16 <sup>c</sup>  | 1.57±0.01 <sup>d</sup>  | 2.05±0.11 <sup>b</sup>  | 2.34±0.01 <sup>a</sup>  |
| GLY      | 0.98±0.09 <sup>d</sup>  | 1.34±0.01 <sup>c</sup>  | 1.26±0.11 <sup>bc</sup>  | 1.52±0.04 <sup>b</sup>    | 1.50±0.08 <sup>b</sup>   | 1.85±0.06 <sup>a</sup>  | 0.98±0.09 <sup>d</sup>  | 1.25±0.07 <sup>c</sup>   | 1.41±0.02 <sup>b</sup>  | 1.17±0.01 <sup>c</sup>  | 1.54±0.08 <sup>b</sup>  | 1.74±0.01 <sup>a</sup>  |
| HIS*     | 0.99±0.02 <sup>b</sup>  | 1.23±0.01 <sup>ab</sup> | 1.23±0.16 <sup>ab</sup>  | 1.25±0.03 <sup>ab</sup>   | 1.51±0.29 <sup>a</sup>   | 1.45±0.01 <sup>a</sup>  | 0.99±0.02 <sup>d</sup>  | 1.15±0.07 <sup>cd</sup>  | 1.37±0.19 <sup>bc</sup> | 1.27±0.04 <sup>bc</sup> | 1.45±0.11 <sup>ab</sup> | 1.64±0.03 <sup>a</sup>  |
| TYR      | 0.73±0.04 <sup>c</sup>  | 1.02±0.02 <sup>b</sup>  | 1.03±0.16 <sup>b</sup>   | 1.08±0.01 <sup>ab</sup>   | 1.19±0.14 <sup>ab</sup>  | 1.25±0.01 <sup>a</sup>  | 0.73±0.04 <sup>d</sup>  | 0.98±0.02 <sup>c</sup>   | 1.11±0.17 <sup>bc</sup> | 0.99±0.02 <sup>c</sup>  | 1.28±0.08 <sup>b</sup>  | 1.48±0.04 <sup>a</sup>  |
| ARG      | 1.31±0.08 <sup>c</sup>  | 1.94±0.01 <sup>b</sup>  | 1.97±0.29 <sup>b</sup>   | 2.13±0.01 <sup>b</sup>    | 2.17±0.11 <sup>b</sup>   | 2.48±0.03 <sup>a</sup>  | 1.31±0.08 <sup>d</sup>  | 1.84±0.03 <sup>c</sup>   | 2.04±0.19 <sup>bc</sup> | 1.77±0.02 <sup>c</sup>  | 2.23±0.21 <sup>b</sup>  | 2.68±0.01 <sup>a</sup>  |
| PRO      | 0.75±0.15 <sup>c</sup>  | 1.06±0.01 <sup>b</sup>  | 1.07±0.13 <sup>b</sup>   | 1.21±0.04 <sup>ab</sup>   | 1.11±0.02 <sup>b</sup>   | 1.37±0.01 <sup>a</sup>  | 0.75±0.15 <sup>d</sup>  | 1.00±0.01 <sup>c</sup>   | 1.12±0.06 <sup>bc</sup> | 0.97±0.04 <sup>c</sup>  | 1.29±0.10 <sup>ab</sup> | 1.46±0.03 <sup>a</sup>  |
| TAA      | 19.78±1.01 <sup>c</sup> | 28.50±1.02 <sup>b</sup> | 29.34±4.49 <sup>b</sup>  | 31.63±0.12 <sup>b</sup>   | 33.17±2.28 <sup>ab</sup> | 36.55±0.01 <sup>a</sup> | 19.78±1.01 <sup>e</sup> | 27.38±0.02 <sup>cd</sup> | 30.54±2.86 <sup>c</sup> | 26.78±0.14 <sup>d</sup> | 34.83±2.21 <sup>b</sup> | 40.23±0.01 <sup>a</sup> |
| EAA      | 7.85±0.55 <sup>d</sup>  | 11.49±0.03 <sup>c</sup> | 11.90±1.97 <sup>bc</sup> | 12.78±0.04 <sup>abc</sup> | 13.78±1.40 <sup>ab</sup> | 14.75±0.01 <sup>a</sup> | 7.85±0.55 <sup>d</sup>  | 11.04±0.03 <sup>c</sup>  | 12.26±1.26 <sup>c</sup> | 10.87±0.01 <sup>c</sup> | 14.30±0.86 <sup>b</sup> | 16.54±0.03 <sup>a</sup> |
| NEAA     | 11.92±0.51 <sup>d</sup> | 17.01±0.03 <sup>c</sup> | 17.34±2.52 <sup>bc</sup> | 18.85±0.16 <sup>abc</sup> | 19.64±1.23 <sup>ab</sup> | 21.80±0.01 <sup>a</sup> | 11.92±0.51 <sup>e</sup> | 16.34±0.01 <sup>cd</sup> | 18.28±1.61 <sup>c</sup> | 15.92±0.13 <sup>d</sup> | 20.53±1.34 <sup>b</sup> | 23.69±0.01 <sup>a</sup> |
| EAA/TAA  | 39.69±1.13 <sup>a</sup> | 40.32±0.02 <sup>a</sup> | 40.67±0.48 <sup>a</sup>  | 40.40±0.26 <sup>a</sup>   | 40.78±0.35 <sup>a</sup>  | 40.36±0.03 <sup>a</sup> | 39.69±1.13 <sup>a</sup> | 40.32±0.04 <sup>a</sup>  | 40.14±0.36 <sup>a</sup> | 40.57±0.18 <sup>a</sup> | 41.06±0.13 <sup>a</sup> | 41.11±0.01 <sup>a</sup> |
| EAA/NEAA | 65.84±3.08 <sup>a</sup> | 67.55±0.02 <sup>a</sup> | 68.55±1.36 <sup>a</sup>  | 67.78±0.74 <sup>a</sup>   | 68.86±1.02 <sup>a</sup>  | 67.66±0.01 <sup>a</sup> | 65.84±3.08 <sup>a</sup> | 67.56±0.01 <sup>a</sup>  | 67.05±0.10 <sup>a</sup> | 68.28±0.53 <sup>a</sup> | 69.67±0.36 <sup>a</sup> | 69.82±0.01 <sup>a</sup> |

Different lowercase letters in the same row (within the same processing method) indicate significant differences according to the different heating times ( $P < 0.05$ ).

HIS—Histidine; ILEU—iso-leucine; LEU—leucine; LYS—lysine; MET—methionine; PHE—phenylalanine; THR—threonine; TYR—tyrosine; VAL—valine; GLU—Glutamic acid; PRO—Prolene; ALA—Alanine; ARG—Arginine; SER—Serine; GLY—Glycine; ASP—Aspartic acid; TAA—total amino acid; EAA—essential amino acid; NEAA—nonessential amino acid.

Supplementary Table S2. Comparison of fatty acid content (%) of camel meat after different thermal processing methods and processing times.

| Processing method | Steaming                |                          |                          |                          |                          |                         | Boiling                 |                          |                          |                          |                         |                          |
|-------------------|-------------------------|--------------------------|--------------------------|--------------------------|--------------------------|-------------------------|-------------------------|--------------------------|--------------------------|--------------------------|-------------------------|--------------------------|
| Processing time   | Untreated               | S-20min                  | S-25min                  | S-30min                  | S-35min                  | S-40min                 | Untreated               | B-20min                  | B-25min                  | B-30min                  | B-35min                 | B-40min                  |
| Fatty acid        |                         |                          |                          |                          |                          |                         |                         |                          |                          |                          |                         |                          |
| C4:0              | 0.03±0.06 <sup>c</sup>  | 0.12±0.01 <sup>bc</sup>  | 0.16±0.05 <sup>b</sup>   | 0.14±0.04 <sup>b</sup>   | 0.26±0.03 <sup>a</sup>   | 0.19±0.01 <sup>ab</sup> | 0.03±0.06 <sup>c</sup>  | 0.28±0.01 <sup>a</sup>   | 0.15±0.06 <sup>b</sup>   | 0.14±0.03 <sup>b</sup>   | 0.13±0.01 <sup>b</sup>  | 0.22±0.01 <sup>ab</sup>  |
| C6:0              | -                       | 0.02±0.01 <sup>bc</sup>  | 0.02±0.01 <sup>bc</sup>  | 0.04±0.01 <sup>b</sup>   | 0.07±0.03 <sup>a</sup>   | 0.04±0.01 <sup>b</sup>  | -                       | 0.12±0.01 <sup>a</sup>   | 0.03±0.01 <sup>c</sup>   | 0.03±0.01 <sup>c</sup>   | 0.02±0.01 <sup>c</sup>  | 0.06±0.01 <sup>b</sup>   |
| C8:0              | -                       | 0.01±0.01 <sup>b</sup>   | 0.02±0.01 <sup>ab</sup>  | 0.02±0.01 <sup>ab</sup>  | 0.02±0.01 <sup>a</sup>   | 0.02±0.01 <sup>a</sup>  | -                       | 0.02±0.01 <sup>a</sup>   | 0.01±0.01 <sup>b</sup>   | 0.02±0.01 <sup>a</sup>   | 0.01±0.01 <sup>b</sup>  | 0.02±0.01 <sup>a</sup>   |
| C10:0             | 0.20±0.35 <sup>a</sup>  | 0.13±0.01 <sup>a</sup>   | 0.21±0.11 <sup>a</sup>   | 0.12±0.01 <sup>a</sup>   | 0.14±0.04 <sup>a</sup>   | 0.13±0.01 <sup>a</sup>  | 0.20±0.35 <sup>a</sup>  | 0.25±0.01 <sup>a</sup>   | 0.08±0.01 <sup>a</sup>   | 0.12±0.03 <sup>a</sup>   | 0.11±0.01 <sup>a</sup>  | 0.13±0.01 <sup>a</sup>   |
| C11:0             | -                       | -                        | -                        | -                        | -                        | -                       | -                       | -                        | -                        | -                        | -                       | -                        |
| C12:0             | 0.27±0.06 <sup>a</sup>  | 0.31±0.01 <sup>a</sup>   | 0.35±0.01 <sup>a</sup>   | 0.34±0.04 <sup>a</sup>   | 0.30±0.02 <sup>a</sup>   | 0.30±0.01 <sup>a</sup>  | 0.27±0.06 <sup>c</sup>  | 0.60±0.01 <sup>a</sup>   | 0.35±0.03 <sup>b</sup>   | 0.40±0.01 <sup>b</sup>   | 0.37±0.01 <sup>b</sup>  | 0.30±0.01 <sup>bc</sup>  |
| C13:0             | -                       | 0.02±0.01 <sup>a</sup>   | 0.03±0.01 <sup>a</sup>   | 0.03±0.01 <sup>a</sup>   | 0.02±0.01 <sup>a</sup>   | 0.02±0.01 <sup>a</sup>  | -                       | 0.02±0.01 <sup>a</sup>   | 0.02±0.01 <sup>a</sup>   | 0.02±0.01 <sup>a</sup>   | 0.02±0.01 <sup>a</sup>  | 0.01±0.01 <sup>a</sup>   |
| C14:0             | 5.62±1.09 <sup>a</sup>  | 6.24±0.01 <sup>a</sup>   | 6.37±0.42 <sup>a</sup>   | 6.78±0.18 <sup>a</sup>   | 6.33±0.56 <sup>a</sup>   | 5.94±0.01 <sup>a</sup>  | 5.62±1.09 <sup>a</sup>  | 5.78±0.01 <sup>a</sup>   | 7.01±0.13 <sup>a</sup>   | 6.61±0.12 <sup>a</sup>   | 6.09±0.01 <sup>a</sup>  | 6.56±0.01 <sup>a</sup>   |
| C14:1             | 0.18±0.07 <sup>a</sup>  | 0.21±0.01 <sup>a</sup>   | 0.22±0.01 <sup>a</sup>   | 0.25±0.01 <sup>a</sup>   | 0.21±0.01 <sup>a</sup>   | 0.20±0.01 <sup>a</sup>  | 0.18±0.07 <sup>d</sup>  | 0.22±0.01 <sup>cd</sup>  | 0.37±0.01 <sup>a</sup>   | 0.32±0.01 <sup>ab</sup>  | 0.28±0.01 <sup>bc</sup> | 0.30±0.01 <sup>abc</sup> |
| C15:0             | 0.44±0.15 <sup>a</sup>  | 0.60±0.01 <sup>a</sup>   | 0.59±0.04 <sup>a</sup>   | 0.59±0.06 <sup>a</sup>   | 0.63±0.04 <sup>a</sup>   | 0.60±0.01 <sup>a</sup>  | 0.44±0.15 <sup>a</sup>  | 0.60±0.01 <sup>a</sup>   | 0.49±0.03 <sup>a</sup>   | 0.55±0.07 <sup>a</sup>   | 0.52±0.01 <sup>a</sup>  | 0.60±0.01 <sup>a</sup>   |
| C15:1             | -                       | -                        | -                        | -                        | -                        | -                       | -                       | -                        | 0.01±0.01 <sup>a</sup>   | 0.01±0.01 <sup>a</sup>   | 0.01±0.01 <sup>a</sup>  | -                        |
| C16:0             | 22.52±1.02 <sup>a</sup> | 23.98±0.01 <sup>a</sup>  | 23.56±0.66 <sup>a</sup>  | 23.94±0.42 <sup>a</sup>  | 23.33±1.04 <sup>a</sup>  | 23.08±0.01 <sup>a</sup> | 22.52±1.02 <sup>b</sup> | 26.25±0.01 <sup>a</sup>  | 27.06±0.98 <sup>a</sup>  | 26.80±0.34 <sup>a</sup>  | 26.11±0.01 <sup>a</sup> | 23.08±0.01 <sup>a</sup>  |
| C16:1             | 3.34±0.37 <sup>ab</sup> | 3.12±0.01 <sup>b</sup>   | 3.35±0.28 <sup>ab</sup>  | 3.77±0.16 <sup>a</sup>   | 3.53±0.24 <sup>ab</sup>  | 2.98±0.01 <sup>b</sup>  | 3.34±0.37 <sup>d</sup>  | 3.83±0.01 <sup>c</sup>   | 5.26±0.08 <sup>a</sup>   | 4.85±0.07 <sup>ab</sup>  | 4.41±0.01 <sup>b</sup>  | 4.44±0.01 <sup>b</sup>   |
| C17:0             | 0.53±0.09 <sup>b</sup>  | 0.67±0.01 <sup>a</sup>   | 0.73±0.02 <sup>a</sup>   | 0.64±0.04 <sup>b</sup>   | 0.70±0.01 <sup>a</sup>   | 0.71±0.01 <sup>a</sup>  | 0.53±0.09 <sup>b</sup>  | 0.78±0.01 <sup>a</sup>   | 0.61±0.11 <sup>b</sup>   | 0.66±0.05 <sup>ab</sup>  | 0.60±0.01 <sup>b</sup>  | 0.71±0.01 <sup>b</sup>   |
| C17:1             | 0.48±0.05 <sup>b</sup>  | 0.59±0.01 <sup>a</sup>   | 0.58±0.02 <sup>a</sup>   | 0.59±0.01 <sup>a</sup>   | 0.60±0.02 <sup>a</sup>   | 0.59±0.01 <sup>a</sup>  | 0.48±0.05 <sup>a</sup>  | 0.54±0.01 <sup>a</sup>   | 0.56±0.01 <sup>a</sup>   | 0.57±0.06 <sup>a</sup>   | 0.55±0.01 <sup>a</sup>  | 0.59±0.01 <sup>a</sup>   |
| C18:0             | 13.19±1.40 <sup>a</sup> | 14.04±0.01 <sup>a</sup>  | 13.43±0.21 <sup>a</sup>  | 13.18±0.13 <sup>a</sup>  | 13.65±0.06 <sup>a</sup>  | 14.16±0.01 <sup>a</sup> | 13.19±1.40 <sup>a</sup> | 11.33±0.01 <sup>ab</sup> | 10.26±0.02 <sup>b</sup>  | 10.55±0.36 <sup>b</sup>  | 11.45±0.01 <sup>b</sup> | 10.84±0.01 <sup>b</sup>  |
| C18:1n9t          | 0.23±0.18 <sup>a</sup>  | 0.39±0.01 <sup>a</sup>   | 0.40±0.01 <sup>a</sup>   | 0.39±0.04 <sup>a</sup>   | 0.44±0.06 <sup>a</sup>   | 0.38±0.01 <sup>a</sup>  | 0.23±0.18 <sup>b</sup>  | 0.51±0.01 <sup>a</sup>   | 0.42±0.05 <sup>ab</sup>  | 0.42±0.01 <sup>ab</sup>  | 0.39±0.01 <sup>ab</sup> | 0.38±0.01 <sup>ab</sup>  |
| C18:1n9c          | 33.88±1.29 <sup>a</sup> | 30.43±0.01 <sup>bc</sup> | 31.45±0.37 <sup>bc</sup> | 32.00±0.49 <sup>ab</sup> | 29.99±1.24 <sup>bc</sup> | 29.50±0.01 <sup>c</sup> | 33.88±1.29 <sup>a</sup> | 30.08±0.01 <sup>c</sup>  | 32.51±0.25 <sup>ab</sup> | 31.27±0.11 <sup>bc</sup> | 29.96±0.01 <sup>c</sup> | 32.26±0.01 <sup>ab</sup> |
| C18:2n6t          | -                       | -                        | -                        | -                        | -                        | -                       | -                       | -                        | 0.01±0.01 <sup>a</sup>   | 0.01±0.01 <sup>a</sup>   | 0.01±0.01 <sup>a</sup>  | -                        |
| C18:2n6c          | 12.04±1.44 <sup>a</sup> | 11.77±0.01 <sup>a</sup>  | 11.42±1.20 <sup>a</sup>  | 10.32±0.96 <sup>a</sup>  | 12.56±1.86 <sup>a</sup>  | 13.37±0.01 <sup>a</sup> | 12.04±1.44 <sup>a</sup> | 12.71±0.01 <sup>a</sup>  | 9.57±0.79 <sup>b</sup>   | 10.46±0.71 <sup>ab</sup> | 12.29±0.01 <sup>a</sup> | 10.98±0.01 <sup>ab</sup> |

|          |                         |                          |                           |                          |                          |                          |                         |                          |                         |                           |                          |                           |
|----------|-------------------------|--------------------------|---------------------------|--------------------------|--------------------------|--------------------------|-------------------------|--------------------------|-------------------------|---------------------------|--------------------------|---------------------------|
| C20:0    | 0.10±0.03 <sup>b</sup>  | 0.18±0.01 <sup>a</sup>   | 0.18±0.01 <sup>a</sup>    | 0.17±0.01 <sup>a</sup>   | 0.16±0.01 <sup>a</sup>   | 0.19±0.01 <sup>a</sup>   | 0.10±0.03 <sup>b</sup>  | 0.18±0.01 <sup>a</sup>   | 0.18±0.01 <sup>a</sup>  | 0.19±0.02 <sup>a</sup>    | 0.20±0.01 <sup>a</sup>   | 0.17±0.01 <sup>a</sup>    |
| C18:3n6  | -                       | 0.08±0.01 <sup>a</sup>   | 0.08±0.01 <sup>a</sup>    | 0.07±0.01 <sup>a</sup>   | 0.05±0.06 <sup>ab</sup>  | 0.09±0.01 <sup>a</sup>   | -                       | -                        | 0.02±0.03 <sup>b</sup>  | 0.06±0.01 <sup>a</sup>    | 0.06±0.01 <sup>a</sup>   | 0.08±0.01 <sup>a</sup>    |
| C20:1    | 0.31±0.02 <sup>a</sup>  | 0.21±0.01 <sup>b</sup>   | 0.23±0.01 <sup>b</sup>    | 0.23±0.01 <sup>b</sup>   | 0.21±0.01 <sup>b</sup>   | 0.20±0.01 <sup>b</sup>   | 0.30±0.02 <sup>ab</sup> | 0.29±0.01 <sup>b</sup>   | 0.35±0.04 <sup>a</sup>  | 0.32±0.01 <sup>ab</sup>   | 0.31±0.01 <sup>ab</sup>  | 0.30±0.01 <sup>ab</sup>   |
| C18:3n3  | 1.76±0.10 <sup>a</sup>  | 1.12±0.01 <sup>bc</sup>  | 1.13±1.41 <sup>bc</sup>   | 0.98±0.06 <sup>c</sup>   | 1.13±0.14 <sup>bc</sup>  | 1.27±0.01 <sup>b</sup>   | 1.76±0.10 <sup>ab</sup> | 1.68±0.01 <sup>bc</sup>  | 1.59±0.01 <sup>c</sup>  | 1.88±0.07 <sup>a</sup>    | 1.89±0.01 <sup>a</sup>   | 1.45±0.01 <sup>d</sup>    |
| C21:0    | -                       | 1.01±0.01 <sup>a</sup>   | 1.02±0.15 <sup>a</sup>    | 1.05±0.10 <sup>a</sup>   | 0.91±0.09 <sup>a</sup>   | 0.92±0.01 <sup>a</sup>   | -                       | 0.47±0.01 <sup>c</sup>   | 0.50±0.03 <sup>bc</sup> | 0.51±0.04 <sup>bc</sup>   | 0.52±0.01 <sup>b</sup>   | 0.60±0.01 <sup>a</sup>    |
| C20:2    | 0.08±0.02 <sup>a</sup>  | 0.10±0.01 <sup>a</sup>   | 0.08±0.02 <sup>a</sup>    | 0.09±0.01 <sup>a</sup>   | 0.09±0.03 <sup>a</sup>   | 0.10±0.01 <sup>a</sup>   | 0.08±0.02 <sup>a</sup>  | 0.08±0.01 <sup>a</sup>   | 0.09±0.01 <sup>a</sup>  | 0.09±0.01 <sup>a</sup>    | 0.09±0.01 <sup>a</sup>   | 0.10±0.01 <sup>a</sup>    |
| C22:0    | 0.43±0.12 <sup>a</sup>  | 0.21±0.01 <sup>b</sup>   | 0.22±0.02 <sup>b</sup>    | 0.20±0.04 <sup>b</sup>   | 0.18±0.04 <sup>b</sup>   | 0.24±0.01 <sup>b</sup>   | 0.43±0.12 <sup>a</sup>  | 0.06±0.01 <sup>b</sup>   | 0.08±0.01 <sup>b</sup>  | 0.09±0.01 <sup>b</sup>    | 0.09±0.01 <sup>b</sup>   | 0.13±0.01 <sup>b</sup>    |
| C20:3n6  | 0.38±0.04 <sup>b</sup>  | 0.47±0.01 <sup>ab</sup>  | 0.46±0.03 <sup>ab</sup>   | 0.44±0.07 <sup>ab</sup>  | 0.50±0.06 <sup>a</sup>   | 0.51±0.01 <sup>a</sup>   | 0.38±0.04 <sup>a</sup>  | 0.30±0.01 <sup>bc</sup>  | 0.23±0.03 <sup>d</sup>  | 0.26±0.02 <sup>cd</sup>   | 0.32±0.01 <sup>ab</sup>  | 0.34±0.01 <sup>ab</sup>   |
| C22:1    | 0.47±0.21 <sup>a</sup>  | 0.10±0.01 <sup>b</sup>   | 0.12±0.03 <sup>b</sup>    | 0.09±0.01 <sup>b</sup>   | 0.15±0.02 <sup>b</sup>   | 0.09±0.01 <sup>b</sup>   | 0.47±0.21 <sup>a</sup>  | 0.22±0.01 <sup>ab</sup>  | 0.07±0.03 <sup>b</sup>  | 0.08±0.04 <sup>b</sup>    | 0.06±0.01 <sup>b</sup>   | 0.10±0.01 <sup>b</sup>    |
| C20:3n3  | -                       | 0.04±0.01 <sup>ab</sup>  | 0.05±0.01 <sup>a</sup>    | 0.04±0.01 <sup>ab</sup>  | 0.04±0.01 <sup>ab</sup>  | 0.03±0.01 <sup>c</sup>   | -                       | 0.03±0.01 <sup>c</sup>   | 0.06±0.01 <sup>a</sup>  | 0.07±0.01 <sup>a</sup>    | 0.05±0.01 <sup>b</sup>   | 0.05±0.01 <sup>b</sup>    |
| C20:4    | 2.66±0.31 <sup>a</sup>  | 0.06±0.01 <sup>b</sup>   | 0.07±0.02 <sup>b</sup>    | 0.07±0.01 <sup>b</sup>   | 0.07±0.01 <sup>b</sup>   | 0.07±0.01 <sup>b</sup>   | 2.66±0.31 <sup>a</sup>  | 0.03±0.01 <sup>b</sup>   | 0.01±0.01 <sup>b</sup>  | 0.01±0.01 <sup>b</sup>    | 0.02±0.01 <sup>b</sup>   | 0.03±0.01 <sup>b</sup>    |
| C23:0    | -                       | 2.59±0.01 <sup>a</sup>   | 2.45±0.06 <sup>a</sup>    | 2.37±0.39 <sup>a</sup>   | 2.61±0.62 <sup>a</sup>   | 2.76±0.01 <sup>a</sup>   | -                       | 1.99±0.01 <sup>b</sup>   | 1.56±0.11 <sup>c</sup>  | 1.85±0.22 <sup>b</sup>    | 2.22±0.01 <sup>a</sup>   | 1.98±0.01 <sup>b</sup>    |
| C22:2n6  | -                       | 0.07±0.01 <sup>a</sup>   | 0.06±0.01 <sup>a</sup>    | 0.06±0.01 <sup>a</sup>   | 0.07±0.02 <sup>a</sup>   | 0.07±0.01 <sup>a</sup>   | -                       | 0.04±0.01 <sup>b</sup>   | 0.04±0.01 <sup>b</sup>  | 0.05±0.01 <sup>a</sup>    | 0.05±0.01 <sup>a</sup>   | 0.04±0.01 <sup>b</sup>    |
| C24:0    | -                       | 0.13±0.01 <sup>a</sup>   | 0.13±0.02 <sup>a</sup>    | 0.12±0.02 <sup>a</sup>   | 0.12±0.04 <sup>a</sup>   | 0.15±0.01 <sup>a</sup>   | -                       | 0.08±0.01 <sup>b</sup>   | 0.05±0.01 <sup>d</sup>  | 0.05±0.01 <sup>d</sup>    | 0.06±0.01 <sup>c</sup>   | 0.13±0.01 <sup>a</sup>    |
| C20:5n3  | 0.94±0.08 <sup>a</sup>  | 0.83±0.01 <sup>a</sup>   | 0.78±0.01 <sup>a</sup>    | 0.77±0.13 <sup>a</sup>   | 0.83±0.23 <sup>a</sup>   | 0.89±0.01 <sup>a</sup>   | 0.94±0.08 <sup>a</sup>  | 0.52±0.01 <sup>b</sup>   | 0.38±0.04 <sup>c</sup>  | 0.49±0.04 <sup>b</sup>    | 0.60±0.01 <sup>b</sup>   | 0.55±0.01 <sup>b</sup>    |
| C24:1    | -                       | 0.06±0.01 <sup>a</sup>   | 0.06±0.01 <sup>a</sup>    | 0.06±0.01 <sup>a</sup>   | 0.04±0.01 <sup>c</sup>   | 0.05±0.01 <sup>b</sup>   | -                       | 0.04±0.01 <sup>b</sup>   | 0.03±0.01 <sup>c</sup>  | 0.03±0.01 <sup>c</sup>    | 0.03±0.01 <sup>c</sup>   | 0.06±0.01 <sup>a</sup>    |
| C22:6    | 0.10±0.03 <sup>a</sup>  | 0.11±0.01 <sup>a</sup>   | 0.10±0.04 <sup>a</sup>    | 0.13±0.04 <sup>a</sup>   | 0.12±0.04 <sup>a</sup>   | 0.15±0.01 <sup>a</sup>   | 0.10±0.03 <sup>a</sup>  | 0.06±0.01 <sup>ab</sup>  | 0.05±0.01 <sup>b</sup>  | 0.07±0.01 <sup>ab</sup>   | 0.08±0.01 <sup>ab</sup>  | 0.08±0.01 <sup>ab</sup>   |
| SFA      | 43.33±0.62 <sup>b</sup> | 50.43±0.24 <sup>a</sup>  | 49.42±1.21 <sup>a</sup>   | 49.67±0.56 <sup>a</sup>  | 49.40±0.97 <sup>a</sup>  | 49.48±0.04 <sup>a</sup>  | 43.33±0.62 <sup>b</sup> | 48.79±0.04 <sup>a</sup>  | 48.42±0.72 <sup>a</sup> | 48.54±0.63 <sup>a</sup>   | 48.51±0.01 <sup>a</sup>  | 47.84±0.04 <sup>a</sup>   |
| UFA      | 56.51±0.66 <sup>a</sup> | 49.77±0.01 <sup>b</sup>  | 50.59±1.23 <sup>b</sup>   | 50.32±0.58 <sup>b</sup>  | 50.60±0.95 <sup>b</sup>  | 50.54±0.01 <sup>b</sup>  | 56.51±0.66 <sup>a</sup> | 51.14±0.06 <sup>b</sup>  | 51.59±0.70 <sup>b</sup> | 51.45±0.65 <sup>b</sup>   | 51.43±0.04 <sup>b</sup>  | 52.18±0.04 <sup>b</sup>   |
| MUFA     | 38.88±1.72 <sup>a</sup> | 35.10±0.01 <sup>bc</sup> | 36.39±0.10 <sup>abc</sup> | 37.36±0.71 <sup>ab</sup> | 35.16±1.53 <sup>bc</sup> | 33.98±0.01 <sup>c</sup>  | 38.88±1.72 <sup>a</sup> | 35.75±0.03 <sup>c</sup>  | 39.56±0.13 <sup>a</sup> | 37.85±0.21 <sup>abc</sup> | 36.25±0.35 <sup>b</sup>  | 38.43±0.04 <sup>abc</sup> |
| PUFA     | 17.63±2.04 <sup>a</sup> | 14.66±0.01 <sup>ab</sup> | 14.20±1.33 <sup>ab</sup>  | 12.96±1.29 <sup>b</sup>  | 15.44±2.49 <sup>ab</sup> | 16.55±0.01 <sup>ab</sup> | 17.63±2.04 <sup>a</sup> | 15.43±0.03 <sup>ab</sup> | 12.03±0.83 <sup>c</sup> | 13.60±0.86 <sup>bc</sup>  | 15.44±0.04 <sup>ab</sup> | 13.68±0.02 <sup>bc</sup>  |
| PUFA/SFA | 0.41±0.05 <sup>a</sup>  | 0.28±0.01 <sup>b</sup>   | 0.29±0.04 <sup>b</sup>    | 0.26±0.03 <sup>b</sup>   | 0.31±0.06 <sup>b</sup>   | 0.32±0.02 <sup>ab</sup>  | 0.41±0.05 <sup>a</sup>  | 0.33±0.01 <sup>b</sup>   | 0.25±0.02 <sup>c</sup>  | 0.29±0.02 <sup>bc</sup>   | 0.33±0.01 <sup>b</sup>   | 0.28±0.01 <sup>bc</sup>   |
| n-6/n-3  | 6.16±1.24 <sup>a</sup>  | 5.73±0.01 <sup>a</sup>   | 5.72±0.30 <sup>a</sup>    | 5.55±0.13 <sup>a</sup>   | 6.11±0.38 <sup>a</sup>   | 5.81±0.01 <sup>a</sup>   | 6.16±1.24 <sup>a</sup>  | 5.66±0.02 <sup>ab</sup>  | 4.77±0.29 <sup>ab</sup> | 4.37±0.06 <sup>b</sup>    | 4.80±0.01 <sup>ab</sup>  | 5.30±0.01 <sup>ab</sup>   |

Supplementary Table S2 continued.

|      | Control                |                        |                        |                        |                        |                        | Microwaving            |                         |                         |                         |                        |                         |
|------|------------------------|------------------------|------------------------|------------------------|------------------------|------------------------|------------------------|-------------------------|-------------------------|-------------------------|------------------------|-------------------------|
|      | Untreated              | F-3min                 | F-4min                 | F-5min                 | F-6min                 | F-7min                 | Untreated              | M-3min                  | M-4min                  | M-5min                  | M-6min                 | M-7min                  |
| C4:0 | 0.03±0.06 <sup>a</sup> | 0.07±0.01 <sup>a</sup> | 0.08±0.03 <sup>a</sup> | 0.05±0.01 <sup>a</sup> | 0.06±0.01 <sup>a</sup> | 0.04±0.01 <sup>a</sup> | 0.03±0.06 <sup>c</sup> | 0.09±0.01 <sup>bc</sup> | 0.12±0.01 <sup>b</sup>  | 0.10±0.01 <sup>bc</sup> | 0.12±0.02 <sup>b</sup> | 0.26±0.01 <sup>a</sup>  |
| C6:0 | -                      | 0.21±0.01 <sup>b</sup> | 0.27±0.01 <sup>a</sup> | 0.13±0.02 <sup>d</sup> | 0.17±0.01 <sup>b</sup> | 0.14±0.01 <sup>d</sup> | -                      | 0.06±0.01 <sup>ab</sup> | 0.07±0.05 <sup>ab</sup> | 0.04±0.01 <sup>bc</sup> | 0.09±0.01 <sup>a</sup> | 0.07±0.01 <sup>ab</sup> |

|          |                          |                          |                          |                          |                          |                          |                         |                         |                          |                          |                          |                          |
|----------|--------------------------|--------------------------|--------------------------|--------------------------|--------------------------|--------------------------|-------------------------|-------------------------|--------------------------|--------------------------|--------------------------|--------------------------|
| C8:0     | -                        | 0.08±0.01 <sup>ab</sup>  | 0.09±0.02 <sup>a</sup>   | 0.05±0.01 <sup>c</sup>   | 0.07±0.01 <sup>abc</sup> | 0.06±0.01 <sup>bc</sup>  | -                       | 0.02±0.01 <sup>a</sup>  | 0.02±0.01 <sup>a</sup>   | 0.02±0.01 <sup>a</sup>   | 0.02±0.01 <sup>a</sup>   | -                        |
| C10:0    | 0.20±0.35 <sup>a</sup>   | 0.09±0.01 <sup>a</sup>   | 0.10±0.02 <sup>a</sup>   | 0.06±0.01 <sup>a</sup>   | 0.07±0.01 <sup>a</sup>   | 0.05±0.01 <sup>a</sup>   | 0.20±0.35 <sup>a</sup>  | 0.14±0.01 <sup>a</sup>  | 0.14±0.08 <sup>a</sup>   | 0.11±0.02 <sup>a</sup>   | 0.09±0.03 <sup>a</sup>   | 0.09±0.01 <sup>a</sup>   |
| C11:0    | -                        | -                        | 0.01±0.01 <sup>a</sup>   | 0.01±0.01 <sup>a</sup>   | -                        | -                        | -                       | -                       | -                        | -                        | -                        | -                        |
| C12:0    | 0.27±0.06 <sup>b</sup>   | 0.47±0.01 <sup>a</sup>   | 0.28±0.06 <sup>b</sup>   | 0.27±0.01 <sup>b</sup>   | 0.26±0.05 <sup>b</sup>   | 0.21±0.01 <sup>b</sup>   | 0.27±0.06 <sup>a</sup>  | 0.32±0.01 <sup>a</sup>  | 0.36±0.06 <sup>a</sup>   | 0.33±0.01 <sup>a</sup>   | 0.32±0.01 <sup>a</sup>   | 0.33±0.01 <sup>a</sup>   |
| C13:0    | -                        | 0.02±0.01 <sup>a</sup>   | 0.02±0.01 <sup>a</sup>   | 0.01±0.01 <sup>b</sup>   | 0.01±0.01 <sup>b</sup>   | 0.01±0.01 <sup>b</sup>   | -                       | 0.02±0.01 <sup>a</sup>  | 0.02±0.01 <sup>a</sup>   | 0.02±0.01 <sup>a</sup>   | 0.01±0.01 <sup>a</sup>   | -                        |
| C14:0    | 5.62±1.09 <sup>b</sup>   | 7.86±0.01 <sup>a</sup>   | 4.85±1.12 <sup>bc</sup>  | 5.38±0.42 <sup>bc</sup>  | 4.34±1.40 <sup>bc</sup>  | 3.31±0.01 <sup>c</sup>   | 5.62±1.09 <sup>a</sup>  | 6.76±0.01 <sup>a</sup>  | 5.81±0.24 <sup>a</sup>   | 6.53±0.18 <sup>a</sup>   | 5.76±0.25 <sup>a</sup>   | 6.40±0.01 <sup>a</sup>   |
| C14:1    | 0.18±0.07 <sup>b</sup>   | 0.52±0.01 <sup>a</sup>   | 0.23±0.07 <sup>b</sup>   | 0.28±0.04 <sup>b</sup>   | 0.24±0.13 <sup>b</sup>   | 0.14±0.01 <sup>b</sup>   | 0.18±0.07 <sup>a</sup>  | 0.22±0.01 <sup>a</sup>  | 0.23±0.01 <sup>a</sup>   | 0.25±0.01 <sup>a</sup>   | 0.26±0.01 <sup>a</sup>   | 0.25±0.01 <sup>a</sup>   |
| C15:0    | 0.44±0.15 <sup>a</sup>   | 0.47±0.01 <sup>a</sup>   | 0.45±0.01 <sup>a</sup>   | 0.41±0.03 <sup>a</sup>   | 0.37±0.04 <sup>a</sup>   | 0.32±0.01 <sup>a</sup>   | 0.44±0.15 <sup>a</sup>  | 0.59±0.01 <sup>a</sup>  | 0.60±0.10 <sup>a</sup>   | 0.60±0.03 <sup>a</sup>   | 0.55±0.02 <sup>a</sup>   | 0.60±0.01 <sup>a</sup>   |
| C15:1    | -                        | -                        | -                        | 0.01±0.01 <sup>a</sup>   | 0.01±0.01 <sup>a</sup>   | 0.01±0.01 <sup>a</sup>   | -                       | -                       | 0.01±0.01 <sup>a</sup>   | -                        | -                        | -                        |
| C16:0    | 22.52±1.02 <sup>c</sup>  | 26.60±0.01 <sup>a</sup>  | 25.26±0.11 <sup>a</sup>  | 24.92±0.40 <sup>ab</sup> | 23.52±1.16 <sup>bc</sup> | 22.53±0.01 <sup>c</sup>  | 22.52±1.02 <sup>b</sup> | 26.89±0.01 <sup>a</sup> | 27.06±2.21 <sup>a</sup>  | 27.18±0.32 <sup>a</sup>  | 27.35±0.38 <sup>a</sup>  | 28.09±0.01 <sup>a</sup>  |
| C16:1    | 3.34±0.37 <sup>bc</sup>  | 5.68±0.01 <sup>a</sup>   | 3.24±0.64 <sup>bc</sup>  | 3.93±0.38 <sup>b</sup>   | 3.24±1.19 <sup>bc</sup>  | 2.40±0.01 <sup>c</sup>   | 3.34±0.37 <sup>c</sup>  | 3.68±0.01 <sup>bc</sup> | 3.96±0.13 <sup>ab</sup>  | 4.27±0.21 <sup>a</sup>   | 4.38±0.03 <sup>a</sup>   | 4.35±0.01 <sup>a</sup>   |
| C17:0    | 0.53±0.09 <sup>a</sup>   | 0.37±0.01 <sup>b</sup>   | 0.53±0.02 <sup>a</sup>   | 0.56±0.06 <sup>a</sup>   | 0.52±0.01 <sup>a</sup>   | 0.48±0.01 <sup>b</sup>   | 0.53±0.09 <sup>b</sup>  | 0.66±0.01 <sup>ab</sup> | 0.70±0.16 <sup>ab</sup>  | 0.63±0.03 <sup>ab</sup>  | 0.64±0.04 <sup>ab</sup>  | 0.76±0.01 <sup>a</sup>   |
| C17:1    | 0.48±0.05 <sup>a</sup>   | 0.45±0.01 <sup>a</sup>   | 0.42±0.05 <sup>ab</sup>  | 0.47±0.04 <sup>a</sup>   | 0.44±0.08 <sup>ab</sup>  | 0.32±0.01 <sup>b</sup>   | 0.48±0.05 <sup>b</sup>  | 0.56±0.01 <sup>a</sup>  | 0.58±0.01 <sup>a</sup>   | 0.60±0.03 <sup>a</sup>   | 0.60±0.01 <sup>a</sup>   | 0.56±0.01 <sup>a</sup>   |
| C18:0    | 13.19±1.40 <sup>a</sup>  | 5.99±0.01 <sup>c</sup>   | 9.95±0.30 <sup>b</sup>   | 9.83±0.18 <sup>b</sup>   | 9.81±0.93 <sup>b</sup>   | 9.60±0.01 <sup>b</sup>   | 13.19±1.40 <sup>a</sup> | 13.15±0.01 <sup>a</sup> | 11.74±0.89 <sup>a</sup>  | 11.58±0.28 <sup>a</sup>  | 11.55±0.30 <sup>a</sup>  | 11.65±0.01 <sup>a</sup>  |
| C18:1n9t | 0.23±0.18 <sup>b</sup>   | 0.66±0.01 <sup>a</sup>   | 0.71±0.14 <sup>a</sup>   | 0.54±0.10 <sup>a</sup>   | 0.64±0.06 <sup>a</sup>   | 0.48±0.01 <sup>ab</sup>  | 0.23±0.18 <sup>b</sup>  | 0.45±0.01 <sup>ab</sup> | 0.47±0.08 <sup>ab</sup>  | 0.45±0.02 <sup>ab</sup>  | 0.49±0.01 <sup>ab</sup>  | 0.54±0.14 <sup>a</sup>   |
| C18:1n9c | 33.88±1.29 <sup>ab</sup> | 30.54±0.01 <sup>b</sup>  | 32.65±0.94 <sup>ab</sup> | 34.16±0.98 <sup>a</sup>  | 32.99±2.06 <sup>ab</sup> | 31.90±0.01 <sup>ab</sup> | 33.88±1.29 <sup>a</sup> | 34.22±0.01 <sup>a</sup> | 31.72±1.34 <sup>bc</sup> | 32.62±0.25 <sup>ab</sup> | 33.37±0.14 <sup>ab</sup> | 30.44±0.01 <sup>c</sup>  |
| C18:2n6t | -                        | 0.02±0.01 <sup>a</sup>   | 0.01±0.01 <sup>b</sup>   | 0.02±0.01 <sup>a</sup>   | 0.02±0.01 <sup>a</sup>   | 0.01±0.01 <sup>b</sup>   | -                       | -                       | -                        | -                        | -                        | -                        |
| C18:2n6c | 12.03±1.44 <sup>c</sup>  | 16.87±0.01 <sup>bc</sup> | 17.59±2.63 <sup>b</sup>  | 15.50±2.43 <sup>bc</sup> | 19.33±4.40 <sup>ab</sup> | 23.59±0.01 <sup>a</sup>  | 12.04±1.44 <sup>a</sup> | 8.45±0.01 <sup>b</sup>  | 11.13±2.68 <sup>ab</sup> | 9.33±1.00 <sup>ab</sup>  | 10.14±0.49 <sup>ab</sup> | 10.59±0.01 <sup>ab</sup> |
| C20:0    | 0.10±0.03 <sup>c</sup>   | 0.10±0.01 <sup>c</sup>   | 0.29±0.04 <sup>b</sup>   | 0.30±0.01 <sup>b</sup>   | 0.32±0.04 <sup>ab</sup>  | 0.36±0.01 <sup>a</sup>   | 0.10±0.03 <sup>b</sup>  | 0.19±0.01 <sup>a</sup>  | 0.20±0.04 <sup>a</sup>   | 0.22±0.04 <sup>a</sup>   | 0.19±0.01 <sup>a</sup>   | 0.16±0.01 <sup>a</sup>   |
| C18:3n6  | -                        | 0.06±0.01 <sup>bc</sup>  | 0.05±0.01 <sup>c</sup>   | 0.06±0.01 <sup>bc</sup>  | 0.07±0.01 <sup>ab</sup>  | 0.08±0.01 <sup>a</sup>   | -                       | 0.06±0.01 <sup>a</sup>  | 0.05±0.03 <sup>a</sup>   | 0.06±0.01 <sup>a</sup>   | 0.05±0.01 <sup>a</sup>   | -                        |
| C20:1    | 0.31±0.02 <sup>b</sup>   | 0.21±0.01 <sup>c</sup>   | 0.31±0.01 <sup>b</sup>   | 0.35±0.01 <sup>a</sup>   | 0.31±0.01 <sup>b</sup>   | 0.29±0.01 <sup>b</sup>   | 0.31±0.02 <sup>ab</sup> | 0.26±0.01 <sup>c</sup>  | 0.30±0.02 <sup>bc</sup>  | 0.31±0.01 <sup>ab</sup>  | 0.34±0.01 <sup>a</sup>   | 0.34±0.01 <sup>a</sup>   |
| C18:3n3  | 1.76±0.10 <sup>ab</sup>  | 1.76±0.01 <sup>ab</sup>  | 1.31±0.06 <sup>c</sup>   | 1.33±0.27 <sup>c</sup>   | 1.46±0.27 <sup>bc</sup>  | 1.93±0.01 <sup>a</sup>   | 1.76±0.10 <sup>a</sup>  | 1.10±0.01 <sup>b</sup>  | 1.42±0.57 <sup>ab</sup>  | 1.45±0.04 <sup>ab</sup>  | 1.08±0.05 <sup>b</sup>   | 1.47±0.01 <sup>ab</sup>  |
| C21:0    | -                        | 0.21±0.01 <sup>a</sup>   | 0.26±0.13 <sup>a</sup>   | 0.26±0.06 <sup>a</sup>   | 0.22±0.04 <sup>a</sup>   | 0.18±0.01 <sup>a</sup>   | -                       | 0.66±0.01 <sup>a</sup>  | 0.53±0.06 <sup>b</sup>   | 0.55±0.07 <sup>b</sup>   | 0.39±0.07 <sup>c</sup>   | 0.48±0.01 <sup>bc</sup>  |
| C20:2    | 0.08±0.02 <sup>a</sup>   | -                        | 0.03±0.01 <sup>ab</sup>  | 0.03±0.01 <sup>ab</sup>  | 0.07±0.05 <sup>a</sup>   | 0.08±0.01 <sup>a</sup>   | 0.08±0.02 <sup>a</sup>  | 0.08±0.01 <sup>a</sup>  | 0.08±0.02 <sup>a</sup>   | 0.08±0.01 <sup>a</sup>   | 0.08±0.01 <sup>a</sup>   | 0.08±0.01 <sup>a</sup>   |
| C22:0    | 0.43±0.12 <sup>a</sup>   | 0.05±0.01 <sup>c</sup>   | 0.25±0.04 <sup>b</sup>   | 0.25±0.01 <sup>b</sup>   | 0.32±0.07 <sup>ab</sup>  | 0.36±0.01 <sup>ab</sup>  | 0.43±0.12 <sup>a</sup>  | 0.11±0.01 <sup>b</sup>  | 0.13±0.02 <sup>b</sup>   | 0.12±0.01 <sup>b</sup>   | 0.15±0.01 <sup>b</sup>   | 0.11±0.01 <sup>b</sup>   |
| C20:3n6  | 0.38±0.04 <sup>a</sup>   | 0.08±0.01 <sup>b</sup>   | 0.09±0.01 <sup>b</sup>   | 0.09±0.01 <sup>b</sup>   | 0.13±0.06 <sup>b</sup>   | 0.11±0.01 <sup>b</sup>   | 0.38±0.04 <sup>a</sup>  | 0.19±0.01 <sup>b</sup>  | 0.27±0.16 <sup>ab</sup>  | 0.24±0.03 <sup>ab</sup>  | 0.23±0.01 <sup>ab</sup>  | 0.23±0.01 <sup>ab</sup>  |
| C22:1    | 0.47±0.01 <sup>a</sup>   | 0.04±0.01 <sup>b</sup>   | 0.04±0.01 <sup>b</sup>   | 0.04±0.01 <sup>b</sup>   | 0.05±0.01 <sup>b</sup>   | 0.02±0.01 <sup>b</sup>   | 0.47±0.21 <sup>a</sup>  | 0.06±0.01 <sup>b</sup>  | 0.09±0.04 <sup>b</sup>   | 0.07±0.06 <sup>b</sup>   | 0.06±0.01 <sup>b</sup>   | 0.09±0.01 <sup>b</sup>   |
| C20:3n3  | -                        | 0.03±0.01 <sup>a</sup>   | 0.02±0.01 <sup>a</sup>   | 0.02±0.01 <sup>a</sup>   | 0.02±0.01 <sup>a</sup>   | 0.02±0.01 <sup>a</sup>   | -                       | 0.03±0.01 <sup>b</sup>  | 0.05±0.03 <sup>ab</sup>  | 0.06±0.01 <sup>ab</sup>  | 0.04±0.01 <sup>ab</sup>  | 0.06±0.01 <sup>a</sup>   |

|          |                         |                         |                         |                         |                         |                         |                          |                         |                          |                          |                         |                         |
|----------|-------------------------|-------------------------|-------------------------|-------------------------|-------------------------|-------------------------|--------------------------|-------------------------|--------------------------|--------------------------|-------------------------|-------------------------|
| C20:4    | 2.66±0.31 <sup>a</sup>  | -                       | 0.05±0.01 <sup>b</sup>  | 0.05±0.01 <sup>b</sup>  | 0.07±0.02 <sup>b</sup>  | 0.06±0.01 <sup>b</sup>  | 2.66±0.31 <sup>a</sup>   | 0.03±0.01 <sup>b</sup>  | 0.04±0.01 <sup>b</sup>   | 0.02±0.01 <sup>b</sup>   | 0.05±0.01 <sup>b</sup>  | 0.03±0.01 <sup>b</sup>  |
| C23:0    | -                       | 0.42±0.01 <sup>a</sup>  | 0.41±0.11 <sup>a</sup>  | 0.45±0.01 <sup>a</sup>  | 0.59±0.27 <sup>a</sup>  | 0.57±0.01 <sup>a</sup>  | -                        | 0.68±0.01 <sup>ab</sup> | 1.53±1.39 <sup>a</sup>   | 1.59±0.06 <sup>a</sup>   | 1.18±0.11 <sup>ab</sup> | 1.46±0.01 <sup>a</sup>  |
| C22:2n6  | -                       | -                       | 0.01±0.01 <sup>a</sup>  | 0.01±0.01 <sup>a</sup>  | 0.02±0.01 <sup>a</sup>  | 0.01±0.01 <sup>a</sup>  | -                        | 0.02±0.01 <sup>a</sup>  | 0.04±0.04 <sup>a</sup>   | 0.04±0.01 <sup>a</sup>   | 0.03±0.01 <sup>a</sup>  | -                       |
| C24:0    | -                       | -                       | 0.12±0.01 <sup>c</sup>  | 0.13±0.01 <sup>bc</sup> | 0.16±0.04 <sup>ab</sup> | 0.17±0.01 <sup>a</sup>  | -                        | 0.07±0.01 <sup>b</sup>  | 0.09±0.02 <sup>b</sup>   | 0.07±0.02 <sup>b</sup>   | 0.12±0.01 <sup>a</sup>  | 0.08±0.01 <sup>b</sup>  |
| C20:5n3  | 0.94±0.08 <sup>a</sup>  | 0.10±0.01 <sup>b</sup>  | 0.09±0.04 <sup>b</sup>  | 0.09±0.01 <sup>b</sup>  | 0.12±0.06 <sup>b</sup>  | 0.12±0.01 <sup>b</sup>  | 0.94±0.08 <sup>a</sup>   | 0.15±0.01 <sup>b</sup>  | 0.43±0.47 <sup>b</sup>   | 0.44±0.01 <sup>b</sup>   | 0.26±0.03 <sup>b</sup>  | 0.34±0.01 <sup>b</sup>  |
| C24:1    | -                       | -                       | 0.01±0.01 <sup>b</sup>  | 0.02±0.01 <sup>a</sup>  | 0.03±0.01 <sup>a</sup>  | 0.02±0.01 <sup>a</sup>  | -                        | 0.03±0.01 <sup>a</sup>  | 0.03±0.01 <sup>a</sup>   | 0.03±0.01 <sup>a</sup>   | 0.04±0.01 <sup>a</sup>  | 0.03±0.01 <sup>a</sup>  |
| C22:6    | 0.10±0.03 <sup>a</sup>  | -                       | -                       | 0.01±0.01 <sup>b</sup>  | 0.01±0.01 <sup>b</sup>  | 0.01±0.01 <sup>b</sup>  | 0.10±0.03 <sup>a</sup>   | -                       | 0.05±0.06 <sup>ab</sup>  | 0.06±0.01 <sup>ab</sup>  | 0.03±0.01 <sup>ab</sup> | 0.02±0.01 <sup>b</sup>  |
| SFA      | 43.33±0.62 <sup>a</sup> | 43.04±0.04 <sup>a</sup> | 43.17±0.90 <sup>a</sup> | 43.03±1.17 <sup>a</sup> | 40.78±1.34 <sup>b</sup> | 38.40±0.01 <sup>c</sup> | 43.33±0.62 <sup>b</sup>  | 50.40±0.02 <sup>a</sup> | 49.08±2.40 <sup>a</sup>  | 49.66±0.49 <sup>a</sup>  | 48.51±0.76 <sup>a</sup> | 50.53±0.02 <sup>a</sup> |
| UFA      | 56.51±0.66 <sup>c</sup> | 57.01±0.01 <sup>c</sup> | 56.84±0.88 <sup>c</sup> | 56.99±1.19 <sup>c</sup> | 59.23±1.34 <sup>b</sup> | 61.50±0.14 <sup>a</sup> | 56.51±0.66 <sup>a</sup>  | 49.57±0.03 <sup>b</sup> | 50.91±2.41 <sup>b</sup>  | 50.35±0.51 <sup>b</sup>  | 51.50±0.74 <sup>b</sup> | 49.39±0.05 <sup>b</sup> |
| MUFA     | 38.88±1.72 <sup>a</sup> | 38.25±1.72 <sup>a</sup> | 37.59±1.85 <sup>a</sup> | 39.79±1.54 <sup>a</sup> | 37.94±3.54 <sup>a</sup> | 35.59±0.01 <sup>a</sup> | 38.88±1.72 <sup>ab</sup> | 39.46±0.03 <sup>a</sup> | 37.37±1.64 <sup>ab</sup> | 38.58±0.45 <sup>ab</sup> | 39.53±0.13 <sup>a</sup> | 36.50±0.14 <sup>b</sup> |
| PUFA     | 17.63±2.04 <sup>b</sup> | 18.94±0.03 <sup>b</sup> | 19.25±2.74 <sup>b</sup> | 17.20±2.73 <sup>b</sup> | 21.30±4.89 <sup>a</sup> | 26.04±0.02 <sup>a</sup> | 17.63±2.04 <sup>a</sup>  | 10.13±0.03 <sup>b</sup> | 13.54±4.05 <sup>a</sup>  | 11.78±0.95 <sup>b</sup>  | 11.97±0.61 <sup>b</sup> | 12.84±0.02 <sup>b</sup> |
| PUFA/SFA | 0.41±0.05 <sup>b</sup>  | 0.46±0.02 <sup>b</sup>  | 0.45±0.07 <sup>b</sup>  | 0.40±0.07 <sup>b</sup>  | 0.53±0.13 <sup>a</sup>  | 0.69±0.01 <sup>a</sup>  | 0.41±0.05 <sup>a</sup>   | 0.21±0.01 <sup>b</sup>  | 0.28±0.10 <sup>b</sup>   | 0.24±0.02 <sup>b</sup>   | 0.25±0.01 <sup>b</sup>  | 0.27±0.03 <sup>b</sup>  |
| n-6/n-3  | 6.16±1.24 <sup>c</sup>  | 9.06±0.03 <sup>b</sup>  | 12.57±0.99 <sup>a</sup> | 11.01±0.48 <sup>a</sup> | 12.22±0.23 <sup>a</sup> | 11.47±0.03 <sup>a</sup> | 6.16±1.24 <sup>a</sup>   | 6.77±0.02 <sup>a</sup>  | 6.59±2.40 <sup>a</sup>   | 4.82±0.66 <sup>a</sup>   | 7.50±0.11 <sup>a</sup>  | 5.85±0.07 <sup>a</sup>  |

Different lowercase letters in the same row (within the same processing method) indicate significant differences according to the different heating times ( $P < 0.05$ ).

- stands for undetected.

The unit of fatty acid content is % and the ratio unit is 1.

SFA—total saturated fatty acid; MUFA—monounsaturated fatty acid; PUFA—polyunsaturated fatty acid; UFA—total unsaturated fatty acid.
